# Supplementary material
Source: PubMed Central journal article supplement (PMC3069686)

S1

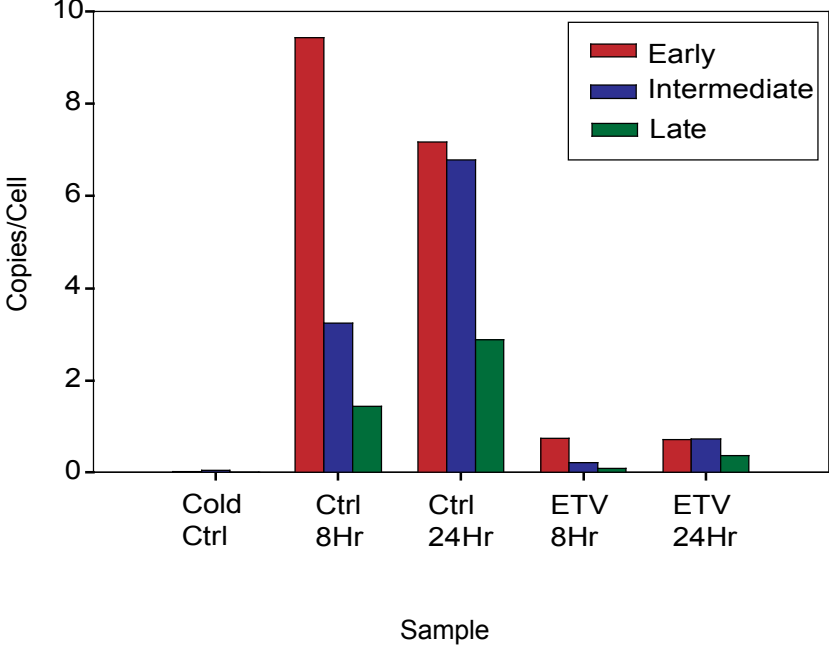

Supplement: NIHMS111163-supplement-supplement_1.pdf [file NIHMS111163-supplement-supplement_1.pdf]
